# Supplementary material for: Co-Infection of Potential Tick-Borne Pathogens of the Order Rickettsiales and Borrelia burgdorferi s. l. and Their Link to Season and Area in Germany
Source: MDPI journal article supplement (doi:10.3390/microorganisms11010157), 2023-01-07
Supplement: s1 [file s1]

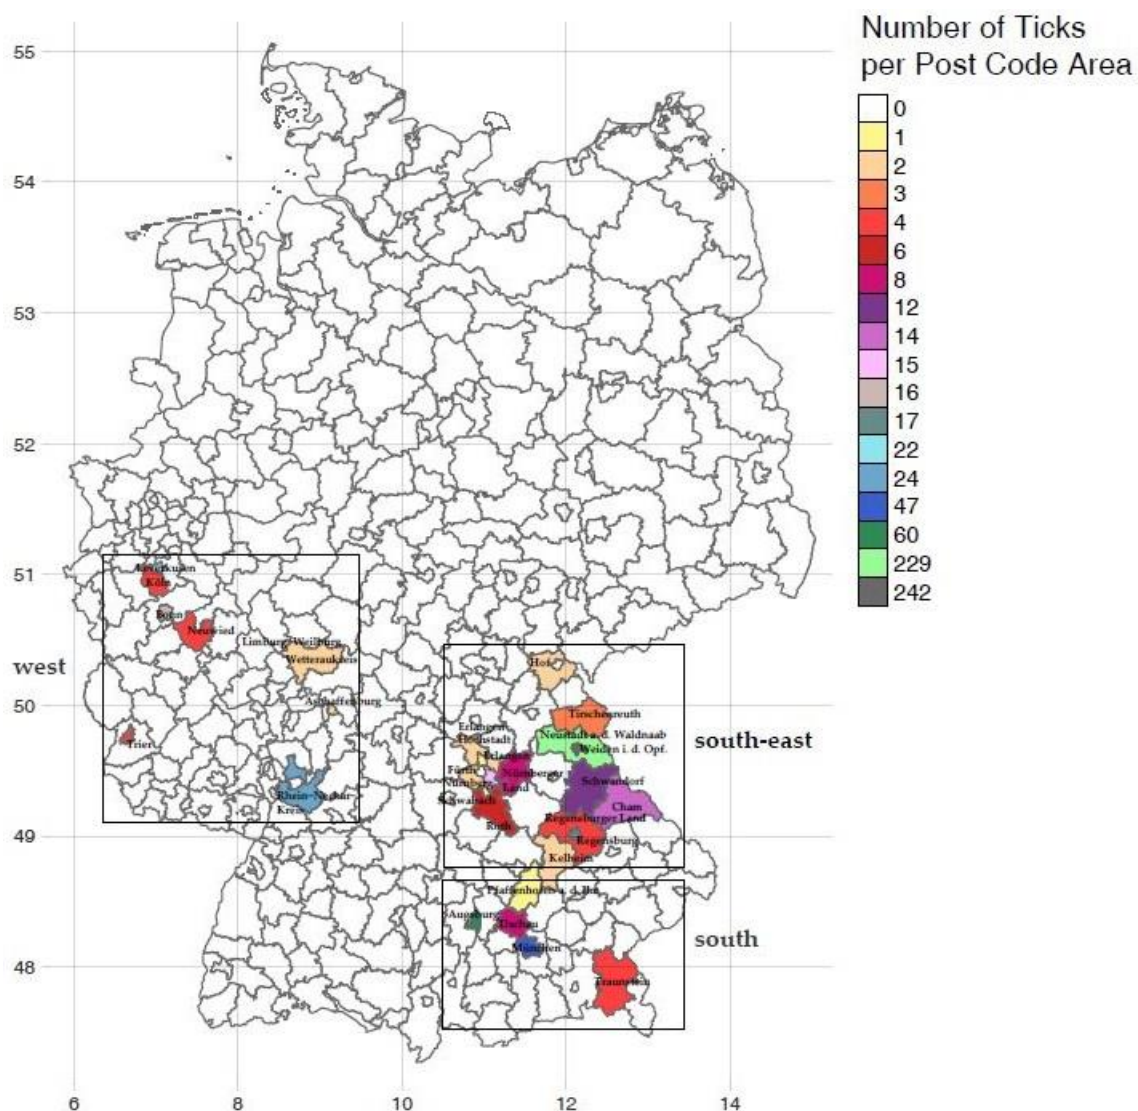

**Figure S2.** Origin of *I. ricinus* ticks on a map of Germany with identification of the districts and district-free cities for the year 2018. Colors indicate the available tick nucleic acid extracts per post code area in the figure.
