# Supplementary material for: Co-Infection of Potential Tick-Borne Pathogens of the Order Rickettsiales and Borrelia burgdorferi s. l. and Their Link to Season and Area in Germany
Source: Microorganisms. 2023 Jan 7;11(1):157. doi: 10.3390/microorganisms11010157 (PMC9861244; doi:10.3390/microorganisms11010157)
Supplement: Supplementary file 1 [file microorganisms-11-00157-s001.zip › supplementary Tables.xlsx]

## Sheet: Table S1
Table S1. Composition of the pools with associated PCR results for the corresponding human pathogen from Rickettsiales, including information on co-infection.
Pool	ID	B. burgdorferi s. l.	Month	Season	Area	Anaplasma phagocytophilum	Neoehrlichia mikurensis	Wolbachia pipentis	Rickettsia spp.	SeqNr. (gltA)	(Co-)occurrence within Rickettsiales	and B. burgdorferi s. l.	all Coinfections
1	1	+	May	spring	west	/	/	/	/		0	0	/
	2	+	May	spring	west	/	/	/	/		0	0	/
	3	+	May	spring	west	x	/	/	/		1	2	BbAp
	4	+	May	spring	west	/	/	/	/		0	0	/
	5	+	May	spring	west	/	/	/	/		0	0	/
	6	+	May	spring	west	/	/	/	/		0	0	/
	7	+	May	spring	west	/	/	/	/		0	0	/
	8	+	May	spring	west	/	/	/	/		0	0	/
	9	+	May	spring	west	/	/	/	/		0	0	/
	10	+	May	spring	west	/	/	/	/		0	0	/
2	1	-	May	spring	west	/	/	/	/		0	0	/
	2	-	May	spring	west	/	/	/	/		0	0	/
	3	-	May	spring	west	/	/	/	/		0	0	/
	4	-	May	spring	west	/	/	/	/		0	0	/
	5	-	May	spring	west	/	/	/	/		0	0	/
	6	-	May	spring	west	/	/	/	/		0	0	/
	7	-	May	spring	west	/	/	/	/		0	0	/
	8	-	May	spring	west	/	/	/	/		0	0	/
	9	-	May	spring	west	/	/	/	/		0	0	/
	10	-	May	spring	west	/	/	/	/		0	0	/
3	1	+	May	spring	south	/	/	x	/		1	2	BbWp
	2	+	May	spring	south	/	/	/	/		0	0	/
	3	+	May	spring	south	/	/	x	/		1	2	BbWp
	4	+	May	spring	south	/	/	/	/		0	0	/
	5	+	May	spring	south	/	/	x	/		1	2	BbWp
	6	+	May	spring	south	/	/	/	/		0	0	/
	7	+	May	spring	south	/	/	x	/		1	2	BbWp
	8	+	May	spring	south	/	/	x	/		1	2	BbWp
	9	+	May	spring	south	/	/	x	/		1	2	BbWp
	10	+	May	spring	south	/	/	/	/		0	0	/
4	1	-	May	spring	south	/	/	/	x	4.1	1	1	/
	2	-	May	spring	south	/	/	/	x	4.2	1	1	/
	3	-	May	spring	south	/	/	/	/		0	0	/
	4	-	May	spring	south	/	/	/	/		0	0	/
	5	-	May	spring	south	/	/	/	/		0	0	/
	6	-	May	spring	south	/	/	/	/		0	0	/
	7	-	May	spring	south	/	/	/	x	4.7	1	1	/
	8	-	May	spring	south	/	/	/	/		0	0	/
	9	-	May	spring	south	/	/	/	/		0	0	/
	10	-	May	spring	south	/	/	/	/		0	0	/
5	1	+	May	spring	southeast	/	/	/	/		0	0	/
	2	+	May	spring	southeast	/	/	/	/		0	0	/
	3	+	May	spring	southeast	/	/	/	x	5.3	1	2	BbR
	4	+	May	spring	southeast	/	/	/	/		0	0	/
	5	+	May	spring	southeast	/	/	/	/		0	0	/
	6	+	May	spring	southeast	/	/	/	/		0	0	/
	7	+	May	spring	southeast	/	/	/	/		0	0	/
	8	+	May	spring	southeast	/	/	/	/		0	0	/
	9	+	May	spring	southeast	/	/	/	/		0	0	/
	10	+	May	spring	southeast	/	/	/	/		0	0	/
6	1	-	May	spring	southeast	/	/	/	/		0	0	/
	2	-	May	spring	southeast	/	/	/	/		0	0	/
	3	-	May	spring	southeast	/	/	/	/		0	0	/
	4	-	May	spring	southeast	/	/	/	/		0	0	/
	5	-	May	spring	southeast	/	/	/	x	6.5	1	1	/
	6	-	May	spring	southeast	/	/	/	x	6.6	1	1	/
	7	-	May	spring	southeast	/	/	/	/		0	0	/
	8	-	May	spring	southeast	/	/	/	/		0	0	/
	9	-	May	spring	southeast	/	/	/	/		0	0	/
	10	-	May	spring	southeast	/	/	/	/		0	0	/
7	1	+	May	spring	southeast	/	/	/	x	7.1	1	2	BbR
	2	+	May	spring	southeast	/	/	/	/		0	0	/
	3	+	May	spring	southeast	/	/	/	/		0	0	/
	4	+	May	spring	southeast	/	/	/	/		0	0	/
	5	+	May	spring	southeast	/	/	/	/		0	0	/
	6	+	May	spring	southeast	/	/	/	x	7.6	1	2	BbR
	7	+	May	spring	southeast	/	/	/	/		0	0	/
	8	+	May	spring	southeast	/	/	/	/		0	0	/
	9	+	May	spring	southeast	/	/	/	/		0	0	/
	10	+	May	spring	southeast	/	/	/	/		0	0	/
8	1	-	May	spring	southeast	/	/	/	/		0	0	/
	2	-	May	spring	southeast	/	/	/	x	8.2	1	1	/
	3	-	May	spring	southeast	/	/	/	/		0	0	/
	4	-	May	spring	southeast	/	/	/	/		0	0	/
	5	-	May	spring	southeast	/	/	/	/		0	0	/
	6	-	May	spring	southeast	/	/	/	/		0	0	/
	7	-	May	spring	southeast	/	/	/	/		0	0	/
	8	-	May	spring	southeast	x	/	/	/		1	1	/
	9	-	May	spring	southeast	/	/	/	/		0	0	/
	10	-	May	spring	southeast	/	/	/	x	8.10	1	1	/
9	1	+	May	spring	southeast	/	/	/	/		0	0	/
	2	+	May	spring	southeast	/	/	/	/		0	0	/
	3	+	May	spring	southeast	/	/	/	/		0	0	/
	4	+	May	spring	southeast	/	/	/	/		0	0	/
	5	+	May	spring	southeast	/	/	/	/		0	0	/
	6	+	May	spring	southeast	/	/	/	/		0	0	/
	7	+	May	spring	southeast	/	/	/	x	9.7	1	2	BbR
	8	+	May	spring	southeast	/	/	/	/		0	0	/
	9	+	May	spring	southeast	/	/	/	/		0	0	/
	10	+	May	spring	southeast	/	/	/	/		0	0	/
10	1	-	May	spring	southeast	/	/	/	/		0	0	/
	2	-	May	spring	southeast	/	/	/	/		0	0	/
	3	-	May	spring	southeast	/	/	/	/		0	0	/
	4	-	May	spring	southeast	/	/	/	/		0	0	/
	5	-	May	spring	southeast	/	/	/	/		0	0	/
	6	-	May	spring	southeast	/	/	/	/		0	0	/
	7	-	May	spring	southeast	/	/	/	/		0	0	/
	8	-	May	spring	southeast	/	/	/	/		0	0	/
	9	-	May	spring	southeast	/	/	/	/		0	0	/
	10	-	May	spring	southeast	/	/	/	/		0	0	/
11	1	+	May	spring	southeast	/	/	/	/		0	0	/
	2	+	May	spring	southeast	/	/	/	/		0	0	/
	3	+	May	spring	southeast	/	/	/	/		0	0	/
	4	+	May	spring	southeast	/	/	/	/		0	0	/
	5	+	May	spring	southeast	/	/	/	/		0	0	/
	6	+	May	spring	southeast	/	/	/	/		0	0	/
	7	+	May	spring	southeast	/	/	/	/		0	0	/
	8	+	May	spring	southeast	/	/	/	/		0	0	/
	9	+	May	spring	southeast	/	/	/	/		0	0	/
	10	+	May	spring	southeast	/	/	/	/		0	0	/
12	1	-	May	spring	southeast	/	/	x	x	12.1	2	2	WpR
	2	-	May	spring	southeast	/	/	/	x	12.2	1	1	/
	3	-	May	spring	southeast	/	/	x	/		1	1	/
	4	-	May	spring	southeast	/	/	/	x	12.4	1	1	/
	5	-	May	spring	southeast	/	/	/	x	12.5	1	1	/
	6	-	May	spring	southeast	/	/	/	/		0	0	/
	7	-	May	spring	southeast	/	/	x	/		1	1	/
	8	-	May	spring	southeast	/	/	/	/		0	0	/
	9	-	May	spring	southeast	/	/	/	x	12.9	1	1	/
	10	-	May	spring	southeast	/	/	/	/		0	0	/
13	1	+	June	summer	west	/	/	x	/		1	2	BbWp
	2	+	June	summer	west	/	/	x	/		1	2	BbWp
	3	+	June	summer	west	/	/	x	/		1	2	BbWp
	4	+	June	summer	west	/	/	x	/		1	2	BbWp
	5	+	June	summer	west	/	/	/	/		0	0	/
	6	+	June	summer	west	/	/	x	x	13.6	2	3	BbWpR
	7	+	June	summer	west	/	/	/	/		0	0	/
	8	+	June	summer	west	/	/	/	/		0	0	/
	9	+	June	summer	west	/	/	/	x	13.9	1	2	BbR
	10	+	June	summer	west	/	/	/	/		0	0	/
14	1	-	June	summer	west	/	/	/	/		0	0	/
	2	-	June	summer	west	/	/	/	/		0	0	/
	3	-	June	summer	west	/	/	/	/		0	0	/
	4	-	June	summer	west	/	/	/	/		0	0	/
	5	-	June	summer	west	/	/	/	/		0	0	/
	6	-	June	summer	west	/	/	/	/		0	0	/
	7	-	June	summer	west	/	/	/	/		0	0	/
	8	-	June	summer	west	/	/	/	/		0	0	/
	9	-	June	summer	west	/	/	/	/		0	0	/
	10	-	June	summer	west	/	/	/	x	14.10	1	1	/
15	1	+	June	summer	west	/	/	/	/		0	0	/
	2	+	June	summer	west	/	/	/	/		0	0	/
	3	+	June	summer	west	/	/	/	x	15.3	1	2	BbR
	4	+	June	summer	west	/	/	/	/		0	0	/
	5	+	June	summer	west	/	/	/	x	15.5	1	2	BbR
	6	+	June	summer	west	/	/	/	/		0	0	/
	7	+	June	summer	west	/	/	/	/		0	0	/
	8	+	June	summer	west	/	/	/	x	15.8	1	2	BbR
	9	+	June	summer	west	/	/	/	/		0	0	/
	10	+	June	summer	west	/	/	/	/		0	0	/
16	1	-	June	summer	west	/	/	/	/		0	0	/
	2	-	June	summer	west	/	/	/	/		0	0	/
	3	-	June	summer	west	/	/	/	/		0	0	/
	4	-	June	summer	west	/	/	/	/		0	0	/
	5	-	June	summer	west	/	/	/	x	16.5	1	1	/
	6	-	June	summer	west	/	/	/	/		0	0	/
	7	-	June	summer	west	/	/	/	/		0	0	/
	8	-	June	summer	west	/	/	/	x	16.8	1	1	/
	9	-	June	summer	west	/	/	/	x	16.9	1	1	/
	10	-	June	summer	west	/	/	/	/		0	0	/
17	1	+	June	summer	south	/	/	/	/		0	0	/
	2	+	June	summer	south	/	/	x	x	17.2	2	3	BbWpR
	3	+	June	summer	south	/	/	/	/		0	0	/
	4	+	June	summer	south	/	/	x	/		1	2	BbWp
	5	+	June	summer	south	/	/	/	/		0	0	/
	6	+	June	summer	south	/	/	/	/		0	0	/
	7	+	June	summer	south	/	/	x	/		1	2	BbWp
	8	+	June	summer	south	/	/	x	/		1	2	BbWp
	9	+	June	summer	south	/	/	/	/		0	0	/
	10	+	June	summer	south	/	/	/	/		0	0	/
18	1	-	June	summer	south	/	/	/	/		0	0	/
	2	-	June	summer	south	/	/	/	/		0	0	/
	3	-	June	summer	south	/	/	/	/		0	0	/
	4	-	June	summer	south	/	/	/	/		0	0	/
	5	-	June	summer	south	/	/	/	/		0	0	/
	6	-	June	summer	south	/	/	/	/		0	0	/
	7	-	June	summer	south	/	/	/	/		0	0	/
	8	-	June	summer	south	x	/	/	/		1	1	/
	9	-	June	summer	south	/	/	/	/		0	0	/
	10	-	June	summer	south	/	/	/	/		0	0	/
19	1	+	June	summer	south	/	/	x	x	19.1	2	3	BbWpR
	2	+	June	summer	south	/	/	/	/		0	0	/
	3	+	June	summer	south	/	/	/	/		0	0	/
	4	+	June	summer	south	/	/	/	/		0	0	/
	5	+	June	summer	south	/	/	x	/		1	2	BbWp
	6	+	June	summer	south	/	/	/	/		0	0	/
	7	+	June	summer	south	/	/	x	/		1	2	BbWp
	8	+	June	summer	south	/	/	/	/		0	0	/
	9	+	June	summer	south	/	/	/	/		0	0	/
	10	+	June	summer	south	/	/	x	/		1	2	BbWp
20	1	-	June	summer	south	/	/	/	/		0	0	/
	2	-	June	summer	south	/	/	/	/		0	0	/
	3	-	June	summer	south	/	/	/	/		0	0	/
	4	-	June	summer	south	/	/	/	/		0	0	/
	5	-	June	summer	south	/	/	/	/		0	0	/
	6	-	June	summer	south	/	/	/	/		0	0	/
	7	-	June	summer	south	/	/	/	x	20.7	1	1	/
	8	-	June	summer	south	/	/	/	x	20.8	1	1	/
	9	-	June	summer	south	/	/	/	/		0	0	/
	10	-	June	summer	south	/	/	/	/		0	0	/
21	1	+	June	summer	southeast	/	/	/	/		0	0	/
	2	+	June	summer	southeast	/	/	x	x	21.2	2	3	BbWpR
	3	+	June	summer	southeast	/	/	x	x	21.3	2	3	BbWpR
	4	+	June	summer	southeast	/	/	/	/		0	0	/
	5	+	June	summer	southeast	/	/	x	x	21.5	2	3	BbWpR
	6	+	June	summer	southeast	/	/	/	/		0	0	/
	7	+	June	summer	southeast	/	/	/	x	21.7	1	2	BbR
	8	+	June	summer	southeast	/	/	/	/		0	0	/
	9	+	June	summer	southeast	/	/	/	/		0	0	/
	10	+	June	summer	southeast	x	/	x	/		2	3	BbApWp
22	1	-	June	summer	southeast	/	/	/	x	22.1	1	1	/
	2	-	June	summer	southeast	/	/	/	/		0	0	/
	3	-	June	summer	southeast	/	/	/	x	22.3	1	1	/
	4	-	June	summer	southeast	/	/	/	/		0	0	/
	5	-	June	summer	southeast	/	/	/	/		0	0	/
	6	-	June	summer	southeast	/	/	/	x	22.6	1	1	/
	7	-	June	summer	southeast	/	/	/	x	22.7	1	1	/
	8	-	June	summer	southeast	/	/	/	x	22.8	1	1	/
	9	-	June	summer	southeast	/	/	/	x	22.9	1	1	/
	10	-	June	summer	southeast	/	/	/	x	22.10	1	1	/
23	1	+	June	summer	southeast	/	/	/	/		0	0	/
	2	+	June	summer	southeast	/	/	/	/		0	0	/
	3	+	June	summer	southeast	/	/	/	/		0	0	/
	4	+	June	summer	southeast	/	/	/	/		0	0	/
	5	+	June	summer	southeast	/	/	/	/		0	0	/
	6	+	June	summer	southeast	/	/	/	/		0	0	/
	7	+	June	summer	southeast	/	/	/	/		0	0	/
	8	+	June	summer	southeast	/	/	/	/		0	0	/
	9	+	June	summer	southeast	/	/	/	/		0	0	/
	10	+	June	summer	southeast	/	/	/	/		0	0	/
24	1	-	June	summer	southeast	/	/	/	/		0	0	/
	2	-	June	summer	southeast	/	/	/	/		0	0	/
	3	-	June	summer	southeast	/	/	/	x	24.3	1	1	/
	4	-	June	summer	southeast	/	/	/	/		0	0	/
	5	-	June	summer	southeast	/	/	/	/		0	0	/
	6	-	June	summer	southeast	/	/	/	/		0	0	/
	7	-	June	summer	southeast	/	/	/	/		0	0	/
	8	-	June	summer	southeast	/	/	/	/		0	0	/
	9	-	June	summer	southeast	/	/	/	/		0	0	/
	10	-	June	summer	southeast	/	/	/	/		0	0	/
25	1	+	June	summer	southeast	/	/	/	/		0	0	/
	2	+	June	summer	southeast	/	/	/	/		0	0	/
	3	+	June	summer	southeast	x	/	/	/		1	2	BbAp
	4	+	June	summer	southeast	/	/	x	/		1	2	BbWp
	5	+	June	summer	southeast	/	/	/	/		0	0	/
	6	+	June	summer	southeast	/	/	/	/		0	0	/
	7	+	June	summer	southeast	/	/	/	/		0	0	/
	8	+	June	summer	southeast	x	/	x	x	25.8	3	4	BbApWpR
	9	+	June	summer	southeast	x	/	/	/		1	2	BbAp
	10	+	June	summer	southeast	x	/	/	x	25.10	2	3	BbApR
26	1	-	June	summer	southeast	/	/	/	/		0	0	/
	2	-	June	summer	southeast	/	/	/	/		0	0	/
	3	-	June	summer	southeast	/	/	/	/		0	0	/
	4	-	June	summer	southeast	/	/	/	/		0	0	/
	5	-	June	summer	southeast	/	/	/	/		0	0	/
	6	-	June	summer	southeast	/	/	/	/		0	0	/
	7	-	June	summer	southeast	/	/	/	/		0	0	/
	8	-	June	summer	southeast	/	/	/	/		0	0	/
	9	-	June	summer	southeast	/	/	/	/		0	0	/
	10	-	June	summer	southeast	/	/	/	/		0	0	/
27	1	+	June	summer	southeast	/	/	/	/		0	0	/
	2	+	June	summer	southeast	/	/	/	x	27.2	1	2	BbR
	3	+	June	summer	southeast	/	/	/	/		0	0	/
	4	+	June	summer	southeast	/	/	/	x	27.4	1	2	BbR
	5	+	June	summer	southeast	/	/	/	x	27.5	1	2	BbR
	6	+	June	summer	southeast	/	/	/	x	27.6	1	2	BbR
	7	+	June	summer	southeast	/	/	/	/		0	0	/
	8	+	June	summer	southeast	/	/	/	x	27.8	1	2	BbR
	9	+	June	summer	southeast	/	/	/	x	27.9	1	2	BbR
	10	+	June	summer	southeast	/	/	/	/		0	0	/
28	1	-	June	summer	southeast	x	/	/	/		1	1	/
	2	-	June	summer	southeast	/	/	/	/		0	0	/
	3	-	June	summer	southeast	x	/	/	/		1	1	/
	4	-	June	summer	southeast	x	/	/	/		1	1	/
	5	-	June	summer	southeast	/	/	/	/		0	0	/
	6	-	June	summer	southeast	x	/	/	/		1	1	/
	7	-	June	summer	southeast	/	/	/	/		0	0	/
	8	-	June	summer	southeast	/	/	/	/		0	0	/
	9	-	June	summer	southeast	x	/	/	/		1	1	/
	10	-	June	summer	southeast	x	/	/	/		1	1	/
29	1	+	June	summer	southeast	/	/	/	/		0	0	/
	2	+	June	summer	southeast	/	/	/	/		0	0	/
	3	+	June	summer	southeast	/	/	/	x	29.3	1	2	BbR
	4	+	June	summer	southeast	x	/	/	x	29.4	2	3	BbApR
	5	+	June	summer	southeast	/	/	/	x	29.5	1	2	BbR
	6	+	June	summer	southeast	/	/	/	x	29.6	1	2	BbR
	7	+	June	summer	southeast	/	/	/	/		0	0	/
	8	+	June	summer	southeast	/	/	/	x	29.8	1	2	BbR
	9	+	June	summer	southeast	/	/	/	x	29.9	1	2	BbR
	10	+	June	summer	southeast	/	/	/	x	29.10	1	2	BbR
30	1	-	June	summer	southeast	x	/	/	/		1	1	/
	2	-	June	summer	southeast	/	/	x	/		1	1	/
	3	-	June	summer	southeast	/	/	/	/		0	0	/
	4	-	June	summer	southeast	/	/	x	/		1	1	/
	5	-	June	summer	southeast	/	/	/	/		0	0	/
	6	-	June	summer	southeast	/	/	/	/		0	0	/
	7	-	June	summer	southeast	/	/	/	/		0	0	/
	8	-	June	summer	southeast	/	/	/	/		0	0	/
	9	-	June	summer	southeast	/	/	x	/		1	1	/
	10	-	June	summer	southeast	/	/	x	/		1	1	/
31	1	+	June	summer	southeast	/	/	/	x	31.1	1	2	BbR
	2	+	June	summer	southeast	/	/	/	x	31.2	1	2	BbR
	3	+	June	summer	southeast	/	/	x	x	31.3	2	3	BbWpR
	4	+	June	summer	southeast	/	/	/	x	31.4	1	2	BbR
	5	+	June	summer	southeast	/	/	x	/		1	2	BbWp
	6	+	June	summer	southeast	/	/	x	/		1	2	BbWp
	7	+	June	summer	southeast	/	/	/	/		0	0	/
	8	+	June	summer	southeast	/	/	/	/		0	0	/
	9	+	June	summer	southeast	/	/	x	x	31.9	2	3	BbWpR
	10	+	June	summer	southeast	/	/	/	x	31.10	1	2	BbR
32	1	-	June	summer	southeast	/	/	/	/		0	0	/
	2	-	June	summer	southeast	/	/	x	/		1	1	/
	3	-	June	summer	southeast	/	/	x	/		1	1	/
	4	-	June	summer	southeast	/	/	/	/		0	0	/
	5	-	June	summer	southeast	/	/	x	/		1	1	/
	6	-	June	summer	southeast	/	/	x	/		1	1	/
	7	-	June	summer	southeast	/	/	x	/		1	1	/
	8	-	June	summer	southeast	/	/	x	/		1	1	/
	9	-	June	summer	southeast	/	/	x	/		1	1	/
	10	-	June	summer	southeast	/	/	x	/		1	1	/
33	1	+	June	summer	southeast	/	/	/	x	33.1	1	2	BbR
	2	+	June	summer	southeast	/	/	/	/		0	0	/
	3	+	June	summer	southeast	/	/	/	x	33.3	1	2	BbR
	4	+	June	summer	southeast	/	/	/	x	33.4	1	2	BbR
	5	+	June	summer	southeast	/	/	/	/		0	0	/
	6	+	June	summer	southeast	/	/	/	/		0	0	/
	7	+	June	summer	southeast	/	/	/	/		0	0	/
	8	+	June	summer	southeast	/	/	/	/		0	0	/
	9	+	June	summer	southeast	/	/	/	/		0	0	/
	10	+	June	summer	southeast	/	/	/	x	33.10	1	2	BbR
34	1	-	June	summer	southeast	/	/	/	/		0	0	/
	2	-	June	summer	southeast	/	/	/	/		0	0	/
	3	-	June	summer	southeast	/	/	/	/		0	0	/
	4	-	June	summer	southeast	/	/	/	/		0	0	/
	5	-	June	summer	southeast	/	/	/	/		0	0	/
	6	-	June	summer	southeast	/	/	/	/		0	0	/
	7	-	June	summer	southeast	/	/	/	/		0	0	/
	8	-	June	summer	southeast	/	/	/	/		0	0	/
	9	-	June	summer	southeast	/	/	/	/		0	0	/
	10	-	June	summer	southeast	/	/	/	/		0	0	/
35	1	+	June	summer	southeast	/	/	/	/		0	0	/
	2	+	June	summer	southeast	/	/	/	x	35.2	1	2	BbR
	3	+	June	summer	southeast	/	/	/	/		0	0	/
	4	+	June	summer	southeast	/	/	/	x	35.4	1	2	BbR
	5	+	June	summer	southeast	/	/	/	x	35.5	1	2	BbR
	6	+	June	summer	southeast	/	/	/	x	35.6	1	2	BbR
	7	+	June	summer	southeast	/	/	/	/		0	0	/
	8	+	June	summer	southeast	/	/	/	x	35.8	1	2	BbR
	9	+	June	summer	southeast	/	/	/	/		0	0	/
	10	+	June	summer	southeast	/	/	/	/		0	0	/
36	1	-	June	summer	southeast	/	/	x	/		1	1	/
	2	-	June	summer	southeast	/	/	x	/		1	1	/
	3	-	June	summer	southeast	/	/	x	/		1	1	/
	4	-	June	summer	southeast	/	/	x	/		1	1	/
	5	-	June	summer	southeast	/	/	/	/		0	0	/
	6	-	June	summer	southeast	/	/	x	/		1	1	/
	7	-	June	summer	southeast	/	/	x	/		1	1	/
	8	-	June	summer	southeast	/	/	x	/		1	1	/
	9	-	June	summer	southeast	/	/	x	/		1	1	/
	10	-	June	summer	southeast	/	/	x	/		1	1	/
37	1	+	June	summer	southeast	/	/	/	/		0	0	/
	2	+	June	summer	southeast	/	/	/	/		0	0	/
	3	+	June	summer	southeast	/	/	/	/		0	0	/
	4	+	June	summer	southeast	/	/	/	/		0	0	/
	5	+	June	summer	southeast	/	/	/	/		0	0	/
	6	+	June	summer	southeast	/	/	/	/		0	0	/
	7	+	June	summer	southeast	/	/	/	/		0	0	/
	8	+	June	summer	southeast	/	/	/	/		0	0	/
	9	+	June	summer	southeast	/	/	/	/		0	0	/
	10	+	June	summer	southeast	/	/	/	/		0	0	/
38	1	-	June	summer	southeast	/	/	/	/		0	0	/
	2	-	June	summer	southeast	/	/	/	x	38.2	1	1	/
	3	-	June	summer	southeast	/	/	/	/		0	0	/
	4	-	June	summer	southeast	/	/	/	x	38.4	1	1	/
	5	-	June	summer	southeast	/	/	/	/		0	0	/
	6	-	June	summer	southeast	/	/	/	/		0	0	/
	7	-	June	summer	southeast	/	/	/	/		0	0	/
	8	-	June	summer	southeast	/	/	/	/		0	0	/
	9	-	June	summer	southeast	/	/	/	/		0	0	/
	10	-	June	summer	southeast	/	/	/	/		0	0	/
39	1	+	June	summer	southeast	/	/	/	/		0	0	/
	2	+	June	summer	southeast	/	/	/	/		0	0	/
	3	+	June	summer	southeast	/	/	/	/		0	0	/
	4	+	June	summer	southeast	/	/	/	/		0	0	/
	5	+	June	summer	southeast	/	/	/	/		0	0	/
	6	+	June	summer	southeast	/	/	/	/		0	0	/
	7	+	June	summer	southeast	/	/	/	/		0	0	/
	8	+	June	summer	southeast	/	/	/	/		0	0	/
	9	+	June	summer	southeast	/	/	/	/		0	0	/
	10	+	June	summer	southeast	/	/	/	/		0	0	/
40	1	-	June	summer	southeast	/	/	/	/		0	0	/
	2	-	June	summer	southeast	/	/	/	/		0	0	/
	3	-	June	summer	southeast	/	/	/	/		0	0	/
	4	-	June	summer	southeast	/	/	/	/		0	0	/
	5	-	June	summer	southeast	/	/	/	/		0	0	/
	6	-	June	summer	southeast	/	/	/	/		0	0	/
	7	-	June	summer	southeast	/	/	/	x	40.7	1	1	/
	8	-	June	summer	southeast	/	/	/	/		0	0	/
	9	-	June	summer	southeast	/	/	/	/		0	0	/
	10	-	June	summer	southeast	/	/	/	/		0	0	/
41	1	+	July	summer	west	/	/	/	/		0	0	/
	2	+	July	summer	west	/	/	x	x	41.2	2	3	BbWpR
	3	+	July	summer	west	/	/	x	/		1	2	BbWp
	4	+	July	summer	west	/	/	x	/		1	2	BbWp
	5	+	July	summer	west	/	/	/	/		0	0	/
	6	+	July	summer	west	/	/	x	x	41.6	2	3	BbWpR
	7	+	July	summer	west	/	/	x	/		1	2	BbWp
	8	+	July	summer	west	/	/	x	/		1	2	BbWp
	9	+	July	summer	west	/	/	x	/		1	2	BbWp
	10	+	July	summer	west	/	/	x	x	41.10	2	3	BbWpR
42	1	-	July	summer	west	/	/	x	x	42.1	2	2	WpR
	2	-	July	summer	west	/	/	x	/		1	1	/
	3	-	July	summer	west	/	/	x	/		1	1	/
	4	-	July	summer	west	/	/	x	/		1	1	/
	5	-	July	summer	west	/	/	x	/		1	1	/
	6	-	July	summer	west	/	/	/	/		0	0	/
	7	-	July	summer	west	/	/	/	/		0	0	/
	8	-	July	summer	west	/	/	x	/		1	1	/
	9	-	July	summer	west	/	/	/	/		0	0	/
	10	-	July	summer	west	/	/	/	/		0	0	/
43	1	+	July	summer	southeast	/	/	/	/		0	0	/
	2	+	July	summer	southeast	/	/	/	/		0	0	/
	3	+	July	summer	southeast	/	/	/	/		0	0	/
	4	+	July	summer	southeast	/	/	/	x	43.4	1	2	BbR
	5	+	July	summer	southeast	/	/	/	/		0	0	/
	6	+	July	summer	southeast	/	/	/	/		0	0	/
	7	+	July	summer	southeast	/	/	/	/		0	0	/
	8	+	July	summer	southeast	/	/	/	/		0	0	/
	9	+	July	summer	southeast	/	/	x	/		1	2	BbWp
	10	+	July	summer	southeast	/	/	/	x	43.10	1	2	BbR
44	1	-	July	summer	southeast	/	/	/	/		0	0	/
	2	-	July	summer	southeast	/	/	/	/		0	0	/
	3	-	July	summer	southeast	/	/	/	/		0	0	/
	4	-	July	summer	southeast	/	/	/	/		0	0	/
	5	-	July	summer	southeast	/	/	/	/		0	0	/
	6	-	July	summer	southeast	/	/	/	/		0	0	/
	7	-	July	summer	southeast	/	/	/	/		0	0	/
	8	-	July	summer	southeast	/	/	/	/		0	0	/
	9	-	July	summer	southeast	/	/	/	/		0	0	/
	10	-	July	summer	southeast	/	/	/	/		0	0	/
45	1	+	July	summer	southeast	/	/	/	x	45.1	1	2	BbR
	2	+	July	summer	southeast	/	/	/	/		0	0	/
	3	+	July	summer	southeast	/	/	/	x	45.3	1	2	BbR
	4	+	July	summer	southeast	/	/	/	/		0	0	/
	5	+	July	summer	southeast	/	/	/	x	45.5	1	2	BbR
	6	+	July	summer	southeast	/	/	/	/		0	0	/
	7	+	July	summer	southeast	/	/	/	/		0	0	/
	8	+	July	summer	southeast	/	/	/	/		0	0	/
	9	+	July	summer	southeast	/	/	/	/		0	0	/
	10	+	July	summer	southeast	/	/	/	/		0	0	/
46	1	-	July	summer	southeast	/	/	/	/		0	0	/
	2	-	July	summer	southeast	/	/	/	/		0	0	/
	3	-	July	summer	southeast	/	/	/	/		0	0	/
	4	-	July	summer	southeast	/	/	/	/		0	0	/
	5	-	July	summer	southeast	/	/	/	/		0	0	/
	6	-	July	summer	southeast	/	/	/	/		0	0	/
	7	-	July	summer	southeast	/	/	/	/		0	0	/
	8	-	July	summer	southeast	/	/	/	/		0	0	/
	9	-	July	summer	southeast	/	/	/	/		0	0	/
	10	-	July	summer	southeast	/	/	/	/		0	0	/
47	1	+	July	summer	southeast	/	/	x	/		1	2	BbWp
	2	+	July	summer	southeast	/	/	/	/		0	0	/
	3	+	July	summer	southeast	/	/	/	/		0	0	/
	4	+	July	summer	southeast	/	/	x	/		1	2	BbWp
	5	+	July	summer	southeast	/	/	x	/		1	2	BbWp
	6	+	July	summer	southeast	/	/	/	/		0	0	/
	7	+	July	summer	southeast	/	/	/	/		0	0	/
	8	+	July	summer	southeast	/	/	/	/		0	0	/
	9	+	July	summer	southeast	/	/	/	/		0	0	/
	10	+	July	summer	southeast	/	/	/	/		0	0	/
48	1	-	July	summer	southeast	/	/	/	x	48.1	1	1	/
	2	-	July	summer	southeast	/	/	/	x	48.2	1	1	/
	3	-	July	summer	southeast	/	/	/	/		0	0	/
	4	-	July	summer	southeast	/	/	/	x	48.4	1	1	/
	5	-	July	summer	southeast	/	/	/	x	48.5	1	1	/
	6	-	July	summer	southeast	/	/	/	x	48.6	1	1	/
	7	-	July	summer	southeast	/	/	/	/		0	0	/
	8	-	July	summer	southeast	/	/	/	x	48.8	1	1	/
	9	-	July	summer	southeast	/	/	/	/		0	0	/
	10	-	July	summer	southeast	/	/	/	/		0	0	/
49	1	+	July	summer	south	/	/	/	/		0	0	/
	2	+	July	summer	south	/	/	/	/		0	0	/
	3	+	July	summer	south	/	/	/	/		0	0	/
	4	+	July	summer	south	/	/	/	x	49.4	1	2	BbR
	5	+	July	summer	south	/	/	/	/		0	0	/
	6	+	July	summer	south	/	/	/	/		0	0	/
	7	+	July	summer	south	/	/	/	x	49.7	1	2	BbR
	8	+	July	summer	south	/	/	/	x	49.8	1	2	BbR
	9	+	July	summer	south	/	/	/	/		0	0	/
	10	+	July	summer	south	/	/	/	/		0	0	/
50	1	-	July	summer	south	/	/	/	/		0	0	/
	2	-	July	summer	south	/	/	/	/		0	0	/
	3	-	July	summer	south	/	/	/	/		0	0	/
	4	-	July	summer	south	/	/	/	/		0	0	/
	5	-	July	summer	south	/	/	x	/		1	1	/
	6	-	July	summer	south	/	/	x	/		1	1	/
	7	-	July	summer	south	/	/	/	/		0	0	/
	8	-	July	summer	south	/	/	x	/		1	1	/
	9	-	July	summer	south	/	/	x	/		1	1	/
	10	-	July	summer	south	/	/	/	/		0	0	/
51	1	+	May	spring	southeast	/	/	x	/		1	2	BbWp
	2	+	May	spring	southeast	x	/	x	x	51.2	3	4	BbApWpR
	3	+	May	spring	southeast	/	/	x	/		1	2	BbWp
	4	+	May	spring	southeast	/	/	x	/		1	2	BbWp
	5	+	May	spring	southeast	/	/	x	/		1	2	BbWp
	6	+	May	spring	southeast	/	/	/	/		0	0	/
	7	+	May	spring	southeast	/	/	x	/		1	2	BbWp
	8	+	May	spring	southeast	/	/	/	/		0	0	/
	9	+	May	spring	southeast	/	/	x	/		1	2	BbWp
	10	+	May	spring	southeast	/	/	x	/		1	2	BbWp
52	1	-	May	spring	southeast	/	/	/	/		0	0	/
	2	-	May	spring	southeast	/	/	/	/		0	0	/
	3	-	May	spring	southeast	/	/	/	/		0	0	/
	4	-	May	spring	southeast	/	/	/	/		0	0	/
	5	-	May	spring	southeast	/	/	/	/		0	0	/
	6	-	May	spring	southeast	/	/	/	/		0	0	/
	7	-	May	spring	southeast	/	/	/	/		0	0	/
	8	-	May	spring	southeast	/	x	/	/		1	1	/
	9	-	May	spring	southeast	/	/	/	/		0	0	/
	10	-	May	spring	southeast	/	/	/	/		0	0	/
53	1	+	May	spring	southeast	/	/	/	/		0	0	/
	2	+	May	spring	southeast	/	/	/	x	53.2	1	2	BbR
	3	+	May	spring	southeast	/	/	/	/		0	0	/
	4	+	May	spring	southeast	/	/	/	/		0	0	/
	5	+	May	spring	southeast	/	/	/	/		0	0	/
	6	+	May	spring	southeast	/	/	/	/		0	0	/
	7	+	May	spring	southeast	/	/	/	/		0	0	/
	8	+	May	spring	southeast	/	/	/	/		0	0	/
	9	+	May	spring	southeast	/	/	/	/		0	0	/
	10	+	May	spring	southeast	/	/	/	/		0	0	/
54	1	-	May	spring	southeast	/	/	/	/		0	0	/
	2	-	May	spring	southeast	/	/	/	/		0	0	/
	3	-	May	spring	southeast	/	/	/	/		0	0	/
	4	-	May	spring	southeast	/	/	/	/		0	0	/
	5	-	May	spring	southeast	/	/	/	/		0	0	/
	6	-	May	spring	southeast	/	/	/	/		0	0	/
	7	-	May	spring	southeast	/	/	/	/		0	0	/
	8	-	May	spring	southeast	/	/	/	/		0	0	/
	9	-	May	spring	southeast	/	/	/	/		0	0	/
	10	-	May	spring	southeast	/	/	/	/		0	0	/
55	1	+	May	spring	southeast	/	/	/	/		0	0	/
	2	+	May	spring	southeast	/	/	/	/		0	0	/
	3	+	May	spring	southeast	/	/	/	/		0	0	/
	4	+	May	spring	southeast	/	/	/	/		0	0	/
	5	+	May	spring	southeast	/	/	/	/		0	0	/
	6	+	May	spring	southeast	/	/	/	/		0	0	/
	7	+	May	spring	southeast	/	/	/	/		0	0	/
	8	+	May	spring	southeast	/	/	/	/		0	0	/
	9	+	May	spring	southeast	/	/	/	/		0	0	/
	10	+	May	spring	southeast	/	/	/	x	55.10	1	2	BbR
56	1	-	May	spring	southeast	/	/	/	/		0	0	/
	2	-	May	spring	southeast	/	/	/	/		0	0	/
	3	-	May	spring	southeast	/	/	/	/		0	0	/
	4	-	May	spring	southeast	/	/	/	/		0	0	/
	5	-	May	spring	southeast	/	/	/	x	56.5	1	1	/
	6	-	May	spring	southeast	/	/	/	/		0	0	/
	7	-	May	spring	southeast	/	/	/	/		0	0	/
	8	-	May	spring	southeast	/	/	/	/		0	0	/
	9	-	May	spring	southeast	/	/	/	/		0	0	/
	10	-	May	spring	southeast	/	/	/	/		0	0	/
57	1	+	June	summer	southeast	/	/	/	/		0	0	/
	2	+	June	summer	southeast	/	/	/	/		0	0	/
	3	+	June	summer	southeast	/	/	/	/		0	0	/
	4	+	June	summer	southeast	/	/	/	/		0	0	/
	5	+	June	summer	southeast	/	/	/	/		0	0	/
	6	+	June	summer	southeast	/	/	/	/		0	0	/
	7	+	June	summer	southeast	/	/	/	/		0	0	/
	8	+	June	summer	southeast	/	/	/	x	57.8	1	2	BbR
	9	+	June	summer	southeast	/	/	/	/		0	0	/
	10	+	June	summer	southeast	/	/	/	/		0	0	/
58	1	-	June	summer	southeast	/	/	x	/		1	1	/
	2	-	June	summer	southeast	/	/	x	x	58.2	2	2	WpR
	3	-	June	summer	southeast	/	/	x	/		1	1	/
	4	-	June	summer	southeast	/	/	x	/		1	1	/
	5	-	June	summer	southeast	/	/	x	/		1	1	/
	6	-	June	summer	southeast	/	/	x	x	58.6	2	2	WpR
	7	-	June	summer	southeast	/	/	/	/		0	0	/
	8	-	June	summer	southeast	/	/	x	/		1	1	/
	9	-	June	summer	southeast	/	/	/	/		0	0	/
	10	-	June	summer	southeast	/	/	x	/		1	1	/
59	1	+	June	summer	southeast	/	/	x	x	59.1	2	3	BbWpR
	2	+	June	summer	southeast	/	/	x	/		1	2	BbWp
	3	+	June	summer	southeast	/	/	x	/		1	2	BbWp
	4	+	June	summer	southeast	/	/	x	/		1	2	BbWp
	5	+	June	summer	southeast	/	/	x	/		1	2	BbWp
	6	+	June	summer	southeast	/	/	x	/		1	2	BbWp
	7	+	June	summer	southeast	/	/	x	x	59.7	2	3	BbWpR
	8	+	June	summer	southeast	/	/	/	/		0	0	/
	9	+	June	summer	southeast	/	/	/	/		0	0	/
	10	+	June	summer	southeast	/	/	/	/		0	0	/
60	1	-	June	summer	southeast	/	/	/	/		0	0	/
	2	-	June	summer	southeast	/	/	/	/		0	0	/
	3	-	June	summer	southeast	/	/	/	/		0	0	/
	4	-	June	summer	southeast	x	/	/	/		1	1	/
	5	-	June	summer	southeast	/	/	/	/		0	0	/
	6	-	June	summer	southeast	/	/	/	/		0	0	/
	7	-	June	summer	southeast	/	/	/	/		0	0	/
	8	-	June	summer	southeast	/	/	/	/		0	0	/
	9	-	June	summer	southeast	/	/	/	/		0	0	/
	10	-	June	summer	southeast	/	/	/	/		0	0	/
61	1	+	June	summer	southeast	/	/	/	/		0	0	/
	2	+	June	summer	southeast	/	/	/	/		0	0	/
	3	+	June	summer	southeast	/	/	/	/		0	0	/
	4	+	June	summer	southeast	/	/	/	x	61.4	1	2	BbR
	5	+	June	summer	southeast	/	/	/	/		0	0	/
	6	+	June	summer	southeast	/	/	/	/		0	0	/
	7	+	June	summer	southeast	/	/	/	/		0	0	/
	8	+	June	summer	southeast	/	/	/	/		0	0	/
	9	+	June	summer	southeast	/	/	/	x	61.9	1	2	BbR
	10	+	June	summer	southeast	/	/	/	x	61.10	1	2	BbR
62	1	-	June	summer	southeast	/	/	/	x	62.1	1	1	/
	2	-	June	summer	southeast	/	/	/	/		0	0	/
	3	-	June	summer	southeast	/	/	/	/		0	0	/
	4	-	June	summer	southeast	/	/	/	/		0	0	/
	5	-	June	summer	southeast	/	/	/	/		0	0	/
	6	-	June	summer	southeast	/	/	/	/		0	0	/
	7	-	June	summer	southeast	/	/	/	/		0	0	/
	8	-	June	summer	southeast	/	/	/	x	62.8	1	1	/
	9	-	June	summer	southeast	/	/	/	/		0	0	/
	10	-	June	summer	southeast	/	/	/	/		0	0	/
63	1	+	July	summer	southeast	/	/	x	/		1	2	BbWp
	2	+	July	summer	southeast	/	/	x	/		1	2	BbWp
	3	+	July	summer	southeast	/	/	x	/		1	2	BbWp
	4	+	July	summer	southeast	/	/	x	/		1	2	BbWp
	5	+	July	summer	southeast	/	/	x	/		1	2	BbWp
	6	+	July	summer	southeast	/	/	x	/		1	2	BbWp
	7	+	July	summer	southeast	/	/	x	/		1	2	BbWp
	8	+	July	summer	southeast	/	/	x	/		1	2	BbWp
	9	+	July	summer	southeast	/	/	/	/		0	0	/
	10	+	July	summer	southeast	/	/	/	/		0	0	/
64	1	-	July	summer	southeast	/	/	/	/		0	0	/
	2	-	July	summer	southeast	/	/	/	/		0	0	/
	3	-	July	summer	southeast	/	/	/	/		0	0	/
	4	-	July	summer	southeast	/	/	/	/		0	0	/
	5	-	July	summer	southeast	/	/	/	/		0	0	/
	6	-	July	summer	southeast	/	/	/	/		0	0	/
	7	-	July	summer	southeast	/	/	/	/		0	0	/
	8	-	July	summer	southeast	/	/	/	/		0	0	/
	9	-	July	summer	southeast	/	/	/	/		0	0	/
	10	-	July	summer	southeast	/	/	/	/		0	0	/
65	1	+	September	autumn	southeast	/	/	/	x	65.1	1	2	BbR
	2	+	September	autumn	southeast	/	/	/	x	65.2	1	2	BbR
	3	+	September	autumn	southeast	/	/	/	/		0	0	/
	4	+	September	autumn	southeast	/	/	/	x	65.4	1	2	BbR
	5	+	September	autumn	southeast	/	/	/	/		0	0	/
	6	+	September	autumn	southeast	/	/	/	x	65.6	1	2	BbR
	7	+	September	autumn	southeast	/	/	/	/		0	0	/
	8	+	September	autumn	southeast	/	/	/	x	65.8	1	2	BbR
	9	+	September	autumn	southeast	/	/	/	x	65.9	1	2	BbR
	10	+	September	autumn	southeast	/	/	/	/		0	0	/
66	1	-	September	autumn	southeast	/	/	/	/		0	0	/
	2	-	September	autumn	southeast	/	/	/	/		0	0	/
	3	-	September	autumn	southeast	/	/	/	/		0	0	/
	4	-	September	autumn	southeast	/	/	/	/		0	0	/
	5	-	September	autumn	southeast	/	/	/	/		0	0	/
	6	-	September	autumn	southeast	/	/	/	/		0	0	/
	7	-	September	autumn	southeast	/	/	/	/		0	0	/
	8	-	September	autumn	southeast	/	/	/	/		0	0	/
	9	-	September	autumn	southeast	/	/	/	/		0	0	/
	10	-	September	autumn	southeast	/	/	/	/		0	0	/
67	1	+	July	summer	southeast	/	/	/	/		0	0	/
	2	+	July	summer	southeast	/	/	/	/		0	0	/
	3	+	July	summer	southeast	/	/	/	/		0	0	/
	4	+	July	summer	southeast	/	/	/	/		0	0	/
	5	+	July	summer	southeast	/	/	/	/		0	0	/
	6	+	July	summer	southeast	/	/	/	/		0	0	/
	7	+	July	summer	southeast	/	/	/	/		0	0	/
	8	+	July	summer	southeast	/	/	/	/		0	0	/
	9	+	July	summer	southeast	/	/	/	/		0	0	/
	10	+	July	summer	southeast	/	/	/	/		0	0	/
68	1	-	July	summer	southeast	/	/	/	x	68.1	1	1	/
	2	-	July	summer	southeast	/	/	/	x	68.2	1	1	/
	3	-	July	summer	southeast	/	/	/	/		0	0	/
	4	-	July	summer	southeast	/	/	/	x	68.4	1	1	/
	5	-	July	summer	southeast	/	/	/	x	68.5	1	1	/
	6	-	July	summer	southeast	/	/	/	x	68.6	1	1	/
	7	-	July	summer	southeast	/	/	/	/		0	0	/
	8	-	July	summer	southeast	/	/	/	x	68.8	1	1	/
	9	-	July	summer	southeast	x	/	/	/		1	1	/
	10	-	July	summer	southeast	/	/	/	x	68.10	1	1	/
69	1	+	June	summer	southeast	/	/	/	/		0	0	/
	2	+	June	summer	southeast	/	/	/	/		0	0	/
	3	+	June	summer	southeast	/	/	/	/		0	0	/
	4	+	June	summer	southeast	/	/	/	/		0	0	/
	5	+	June	summer	southeast	/	/	/	/		0	0	/
	6	+	June	summer	southeast	/	/	/	/		0	0	/
	7	+	June	summer	southeast	/	/	/	/		0	0	/
	8	+	June	summer	southeast	/	/	/	/		0	0	/
	9	+	June	summer	southeast	/	/	/	/		0	0	/
	10	+	June	summer	southeast	/	/	/	/		0	0	/
70	1	-	June	summer	southeast	/	/	/	/		0	0	/
	2	-	June	summer	southeast	/	/	/	/		0	0	/
	3	-	June	summer	southeast	/	/	/	/		0	0	/
	4	-	June	summer	southeast	/	/	/	/		0	0	/
	5	-	June	summer	southeast	/	/	/	/		0	0	/
	6	-	June	summer	southeast	/	/	/	/		0	0	/
	7	-	June	summer	southeast	/	/	/	/		0	0	/
	8	-	June	summer	southeast	/	/	/	/		0	0	/
	9	-	June	summer	southeast	/	/	/	/		0	0	/
	10	-	June	summer	southeast	/	/	/	/		0	0	/
71	1	+	September	autumn	southeast	/	/	/	/		0	0	/
	2	+	September	autumn	southeast	/	/	/	/		0	0	/
	3	+	September	autumn	southeast	/	/	/	/		0	0	/
	4	+	September	autumn	southeast	/	/	/	/		0	0	/
	5	+	September	autumn	southeast	/	/	/	/		0	0	/
	6	+	September	autumn	southeast	/	/	/	/		0	0	/
	7	+	September	autumn	southeast	/	/	/	/		0	0	/
	8	+	September	autumn	southeast	/	/	/	/		0	0	/
	9	+	September	autumn	southeast	/	/	/	/		0	0	/
	10	+	September	autumn	southeast	/	/	/	/		0	0	/
72	1	-	September	autumn	southeast	/	/	/	x	72.1	1	1	/
	2	-	September	autumn	southeast	/	/	/	x	72.2	1	1	/
	3	-	September	autumn	southeast	/	/	/	/		0	0	/
	4	-	September	autumn	southeast	/	/	/	x	72.4	1	1	/
	5	-	September	autumn	southeast	/	/	/	x	72.5	1	1	/
	6	-	September	autumn	southeast	/	/	/	/		0	0	/
	7	-	September	autumn	southeast	/	/	/	x	72.7	1	1	/
	8	-	September	autumn	southeast	/	/	/	/		0	0	/
	9	-	September	autumn	southeast	/	/	/	/		0	0	/
	10	-	September	autumn	southeast	/	/	/	/		0	0	/
73	1	+	June	summer	south	/	/	/	/		0	0	/
	2	+	June	summer	south	/	/	/	/		0	0	/
	3	+	June	summer	south	/	/	/	/		0	0	/
	4	+	June	summer	south	/	/	/	/		0	0	/
	5	+	June	summer	south	/	/	/	x	73.5	1	2	BbR
	6	+	June	summer	south	/	/	/	/		0	0	/
	7	+	June	summer	south	/	/	/	x	73.7	1	2	BbR
	8	+	June	summer	south	/	/	/	/		0	0	/
	9	+	June	summer	south	/	/	/	/		0	0	/
	10	+	June	summer	south	/	/	/	x	73.10	1	2	BbR
74	1	-	June	summer	south	/	/	/	/		0	0	/
	2	-	June	summer	south	/	/	/	/		0	0	/
	3	-	June	summer	south	x	/	/	/		1	1	/
	4	-	June	summer	south	/	/	/	/		0	0	/
	5	-	June	summer	south	/	/	/	/		0	0	/
	6	-	June	summer	south	/	/	/	/		0	0	/
	7	-	June	summer	south	x	/	/	/		1	1	/
	8	-	June	summer	south	/	/	/	/		0	0	/
	9	-	June	summer	south	/	/	/	/		0	0	/
	10	-	June	summer	south	/	/	/	/		0	0	/
75	1	+	September	autumn	south	/	/	x	/		1	2	BbWp
	2	+	September	autumn	south	/	/	x	/		1	2	BbWp
	3	+	September	autumn	south	/	/	x	/		1	2	BbWp
	4	+	September	autumn	south	/	/	x	/		1	2	BbWp
	5	+	September	autumn	south	/	/	x	/		1	2	BbWp
	6	+	September	autumn	south	/	/	x	/		1	2	BbWp
	7	+	September	autumn	south	/	/	x	/		1	2	BbWp
	8	+	September	autumn	south	/	/	/	/		0	0	/
	9	+	September	autumn	south	/	/	/	/		0	0	/
	10	+	September	autumn	south	/	/	/	/		0	0	/
76	1	-	September	autumn	south	/	/	x	/		1	1	/
	2	-	September	autumn	south	/	/	x	/		1	1	/
	3	-	September	autumn	south	/	/	x	/		1	1	/
	4	-	September	autumn	south	/	/	x	/		1	1	/
	5	-	September	autumn	south	/	/	x	/		1	1	/
	6	-	September	autumn	south	/	/	x	/		1	1	/
	7	-	September	autumn	south	/	/	x	/		1	1	/
	8	-	September	autumn	south	/	/	/	/		0	0	/
	9	-	September	autumn	south	/	/	/	/		0	0	/
	10	-	September	autumn	south	/	/	x	/		1	1	/

## Sheet: Table S2
Table S2. OTU count table of the gltA gene-based amplicon sequencing.
#OTU ID	4.1	4.2	4.7	5.3	6.5	6.6	7.1	7.6	8.2	8.10	9.7	12.1	12.2	12.4	12.5	12.9	13.6	13.9	14.10	15.3	15.5	15.8	16.5	16.8	16.9	17.2	19.1	20.8	21.2	21.3	21.5	22.3	25.8	25.10	27.2	27.4	27.5	27.6	27.8	27.9	29.3	29.5	29.8	29.9	29.10	31.1	31.2	31.3	33.3
Otu00001	0	31	15	0	13	12	47	57	30	35	49	53	52	11	7	52	16	18	60	55	33	4	37	33	67	48	26	1	2	2	41	44	16	0	26	57	32	40	78	8	46	17	41	34	60	16	10	38	56
Otu00002	0	0	0	0	0	0	0	0	0	0	0	0	0	0	0	0	0	0	0	0	0	0	0	0	0	0	0	0	0	0	0	0	0	0	0	0	0	0	0	0	0	0	0	0	0	0	0	0	0
Otu00003	42	0	0	0	0	0	0	0	0	0	0	0	0	0	0	0	0	0	0	0	0	0	0	0	0	0	0	0	0	0	0	0	0	0	0	0	0	0	0	0	0	0	0	0	0	0	0	0	0
Otu00004	0	0	0	0	0	0	0	0	0	0	0	0	0	0	0	0	0	0	0	0	0	0	0	0	0	0	0	0	0	0	0	0	0	0	0	0	0	0	0	0	0	0	0	0	0	0	0	0	0
Otu00005	0	0	0	0	0	0	0	0	0	0	0	0	0	0	0	0	0	0	0	0	0	0	0	0	0	0	0	0	0	0	0	0	0	22	0	0	0	0	0	0	0	0	0	0	0	0	0	0	0
Otu00006	0	0	0	0	0	0	0	0	3	0	0	0	0	0	0	0	0	0	0	0	1	0	0	2	0	0	0	0	0	0	0	1	0	0	0	0	1	0	0	1	0	0	0	0	0	0	0	0	0
Otu00007	0	0	0	0	0	0	0	0	0	0	0	0	0	0	0	0	0	0	0	0	0	0	0	0	0	0	0	0	0	0	0	0	0	0	0	0	0	0	0	0	0	0	0	0	0	0	0	0	0
Otu00008	0	0	0	0	0	0	0	0	0	0	0	0	0	0	0	0	0	0	0	0	0	0	0	0	0	0	0	0	0	0	0	0	0	0	0	0	0	0	0	0	0	0	0	0	0	0	0	0	0
Otu00009	0	0	0	0	0	0	0	0	0	0	0	0	0	0	0	0	0	0	0	0	0	0	0	0	0	0	0	0	0	0	0	0	0	0	1	0	0	2	0	0	0	0	0	0	0	0	1	2	0
Otu00010	0	0	0	0	0	0	0	0	1	0	0	0	0	0	0	0	0	1	0	1	0	0	1	0	0	0	0	0	0	0	0	0	0	0	0	0	0	0	1	0	0	0	0	2	0	0	0	0	0
Otu00011	0	0	0	0	0	0	0	0	0	0	0	1	0	0	0	0	0	0	1	0	0	0	0	0	0	0	0	0	0	0	0	0	0	0	0	0	0	0	0	0	0	0	0	0	0	0	0	0	1
Otu00012	0	1	0	0	0	0	1	0	0	0	0	0	0	0	0	0	0	0	0	0	0	0	0	0	0	0	0	0	0	0	0	0	0	0	0	0	0	0	0	0	0	1	0	0	0	0	0	0	0
Otu00013	0	0	0	0	0	0	0	1	0	0	0	0	0	0	0	0	0	0	0	0	0	0	0	0	0	0	1	0	0	0	0	0	0	0	0	0	0	0	0	0	0	0	0	0	1	1	0	0	0
Otu00014	0	0	0	5	0	0	0	0	0	0	0	0	0	0	0	0	0	0	0	0	0	0	0	0	0	0	0	0	0	0	0	0	0	0	0	0	0	0	0	0	0	0	0	0	0	0	0	0	0
Otu00015	0	0	0	0	0	0	0	1	0	0	0	0	0	0	0	0	0	0	0	0	0	0	0	0	0	0	0	0	0	0	0	0	0	0	0	0	0	0	0	0	0	0	0	0	0	0	0	0	0
Otu00016	0	0	0	0	0	0	0	0	0	0	0	0	0	0	0	0	0	0	0	0	0	0	0	0	0	1	0	0	0	0	0	0	0	0	0	0	1	0	0	0	0	0	0	0	1	0	0	0	0
Otu00017	0	0	0	0	0	0	0	0	0	0	2	0	0	0	0	0	0	0	0	1	0	0	0	0	0	0	0	0	0	0	0	0	0	0	0	0	0	0	0	0	1	0	0	0	0	0	0	0	0
Otu00018	0	0	0	0	0	0	0	0	0	0	0	0	0	0	0	0	0	0	0	0	0	0	0	0	0	0	0	0	0	0	0	0	0	0	0	0	3	0	0	0	0	0	0	0	0	0	0	0	0
Otu00019	0	0	0	0	0	0	0	0	0	2	0	0	0	0	0	0	0	0	0	0	0	0	0	0	0	0	0	0	0	0	1	0	0	0	0	0	0	0	0	0	0	0	0	0	0	0	0	0	0
Otu00020	0	0	0	0	0	0	0	0	0	0	0	0	0	0	0	0	0	0	0	0	0	0	0	0	0	0	1	0	0	0	0	0	0	0	0	0	0	0	0	0	0	0	0	0	0	0	0	0	0
Otu00021	0	0	0	0	0	0	0	0	0	0	0	0	0	0	0	0	0	0	0	0	0	0	1	0	0	0	0	0	0	0	0	0	0	0	0	0	0	0	0	0	0	0	0	0	0	0	0	0	0
Otu00022	0	0	0	0	0	0	0	0	0	0	0	0	0	0	0	0	0	0	0	0	0	0	0	0	0	0	0	0	0	0	0	0	0	0	0	0	0	0	0	0	0	0	0	0	0	0	0	0	0
Otu00023	0	0	0	0	0	0	0	0	0	0	0	0	0	0	0	0	0	0	0	0	0	0	0	0	0	0	0	0	0	0	0	0	0	0	0	0	0	0	0	0	0	0	0	0	0	0	0	0	0
Otu00024	0	0	0	0	0	0	0	0	0	0	0	0	0	0	0	0	0	0	0	0	0	0	0	0	0	0	0	0	0	0	0	0	0	0	0	0	0	0	0	0	0	0	0	0	0	0	0	0	0
[truncated: 52 more columns]

## Sheet: Table S3
Table S3. Overview of the Rickettsiaspecies included in the gltA gene-based database and their distribution.
Species	Distribution	Host	Accession numbers
Rickettsia felis	Germany; Europe; worldwide	fleas	NC_007109.1
Rickettsia helvetica	Germany; Europe; Africa; Asia	ticks	NZ_CM001467.1
Rickettsia massiliae	Germany; Europe; Africa; Asia; America	ticks	NC_009900.1
Rickettsia monacensis	Germany; Europe; Africa	ticks	LN794217.1
Rickettsia raoultii	Germany; Europe; Africa; Asia	ticks	DQ365803.1
Rickettsia slovaca	Germany; Europe; Asia	ticks	MT667405.1
Rickettsia aeschlimannii	Europe; Africa	ticks	HQ335153.1
Rickettsia conorii	Europe; Africa; Asia	ticks	EU716648.1
Rickettsia sibirica	Europe; Africa; Asia	ticks	KY780024.1
Rickettsia africae	Africa; North and Central America, Caribbean	ticks	NC_012633.1
Rickettsia japonica	Asia	ticks	NZ_AP017574.1
Rickettsia endosymbiont of I. scapularis	North America	ticks	CM000770.1
Rickettsia akari	worldwide	mites	U59717.1
